# Supplementary material
Source: publisher figshare collection journal article supplement (https://springernature.figshare.com/ndownloader/files/30882990)
Supplement: Supplementary file [file 30882990]

**Table S1. Genotype of seedlings from F1 to F5**

| Generation   | Line name   | Recombinant DNAs Containing |                  |                          |           | Total line |
|--------------|-------------|-----------------------------|------------------|--------------------------|-----------|------------|
|              |             | rmGM-CSF only               | OsMYBS2RNAi only | rmGM-CSF and OsMYBS2RNAi | wild type |            |
| F1 seedlings | GS-         | 1                           | -                | 2                        | 0         | 3          |
| F2 seedlings | GS2Ri-      | 3                           | 9                | 13                       | 0         | 25         |
|              | GS3Ri-      | 4                           | 3                | 11                       | 0         | 18         |
| F3 seedlings | GS2Ri1-     | 15                          | 0                | 36                       | 0         | 51         |
|              | GS2Ri4-     | 10                          | 0                | 25                       | 0         | 35         |
|              | GS2Ri1-2-   | 0                           | 0                | 10                       | 0         | 10         |
| F4 seedlings | GS2Ri1-4-   | 0                           | 0                | 9                        | 0         | 9          |
|              | GS2Ri4-1-   | 2                           | 0                | 6                        | 0         | 8          |
|              | GS2Ri4-4-   | 5                           | 0                | 5                        | 0         | 10         |
|              | GS2Ri1-2-1- | 0                           | 0                | 5                        | 0         | 5          |
| F5 seedlings | GS2Ri4-1-2- | 0                           | 0                | 10                       | 0         | 10         |
|              | GS2Ri4-4-1- | 0                           | 0                | 8                        | 0         | 8          |

## Supplementary Fig. 1

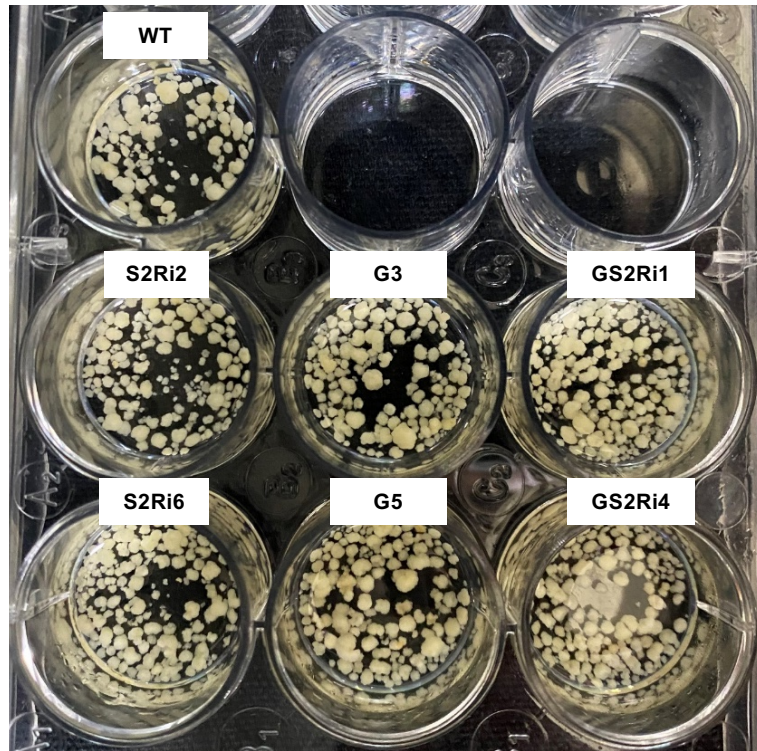

Fig. S1. Suspension rice cell morphology of the WT, two *OsMYBS2RNAi* only lines, S2Ri2 and S2Ri6, two *mGM-CSF* only lines, G3 and G5, and two *mGM-CSF/OsMYBS2RNAi* lines, GS2Ri1 and GS2Ri4. Photos were taken from suspension cultured rice cells plated in N6 liquid medium for 2 days.

## Supplementary Fig. 2

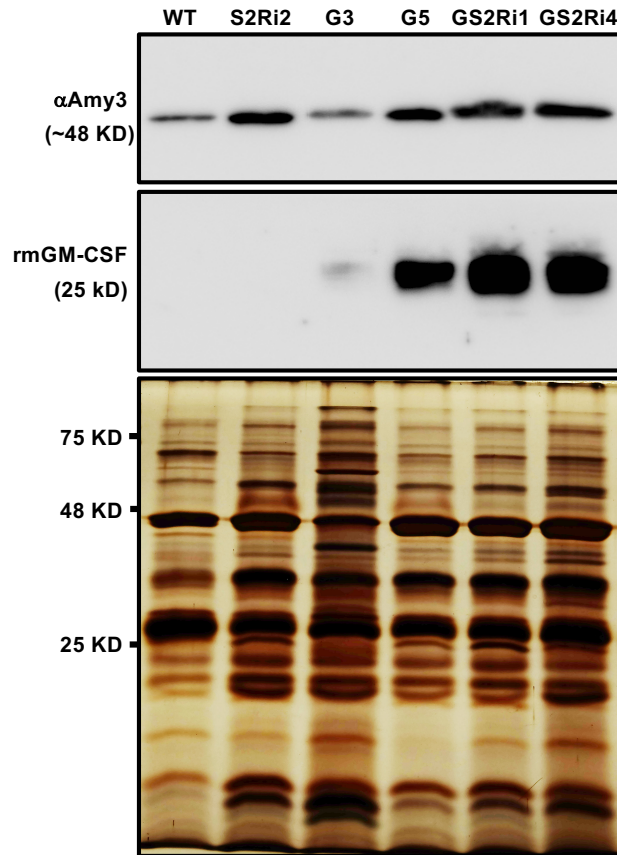

Fig. S2. Abundance of rmGM-CSF in *mGM-CSF/OsMYBS2RNAi* transgenic rice suspension cell lines was higher than that in mGM-CSF only transgenic lines.

One milliliter of suspension cells, consisting of the wild type (WT), one OsMYBS2 knockdown line S2Ri2, two mGM-CSF gene transgenic lines G3 and G5, and two OsMYBS2 knockdown and mGM-CSF transgenic lines GS2Ri1 and GS2Ri4, were cultured in 2 mL sugar-free N6 medium for 7 days. Samples of culture medium were collected to determine  $\alpha$ Amy3 and rmGM-CSF by western blot analysis with specific antibodies to  $\alpha$ Amy3 and mGM-CSF, respectively. Silver staining was used to visualize bands in the culture medium and represent the loading control.

## Supplementary Fig. 3

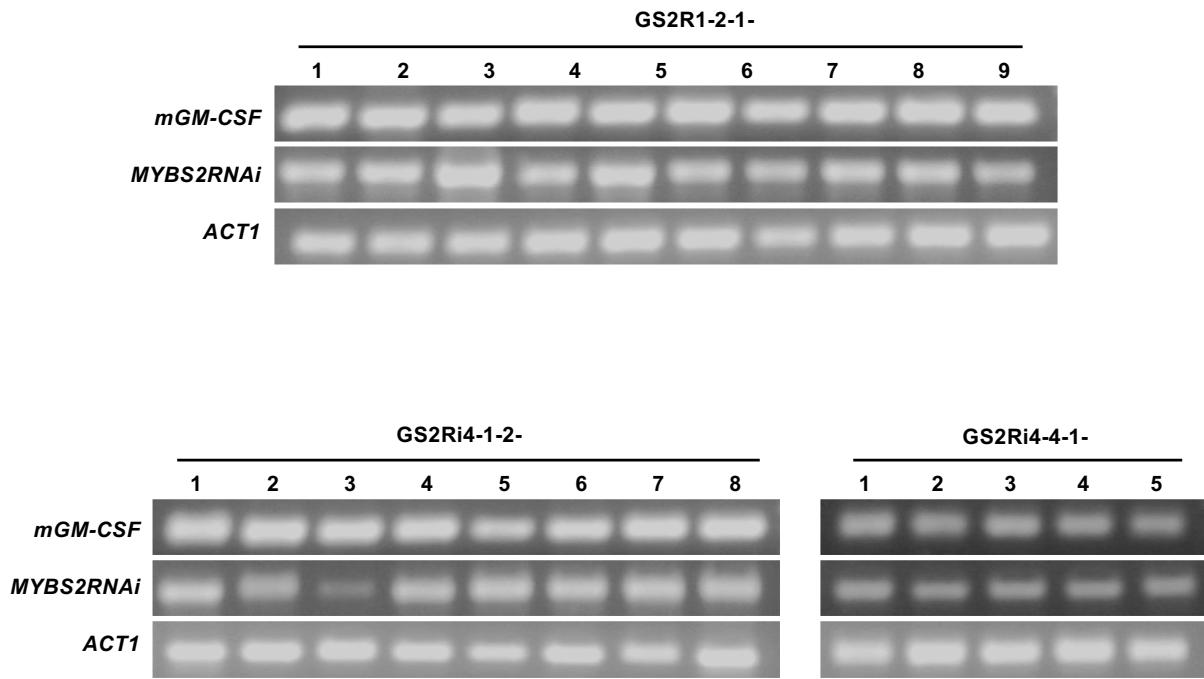

Fig. S3. PCR-based detection of  $\alpha Amy3::mGM-CSF$  and *Ubi::OsMYBS2RNAi* chimeric genes in selected F5 progeny derived from self-pollination of the F4 population. The primer sets for *mGM-CSF* and *MYBS2RNAi* were used to amplify specifically the  $\alpha Amy3::mGM-CSF$  and *Ubi::OsMYBS2RNAi* chimeric genes, respectively.
